# Supplementary material for: Effects of helminths and anthelmintic treatment on cardiometabolic diseases and risk factors: A systematic review
Source: PLoS Negl Trop Dis. 2023 Feb 24;17(2):e0011022. doi: 10.1371/journal.pntd.0011022 (PMC9956023; doi:10.1371/journal.pntd.0011022)
Supplement: S2 Appendix — (CSV) [file pntd.0011022.s013.csv]

Covidence #	Study ID	Title	Helminth(s)	Helminth(s) specified if mixed infection or further clarification needed/provided	First author, year, journal	Study design	Country	Study population	Sample size	Outcome measures	Key findings	Effect of anthelmintic therapy on outcome measures (if applicable)
11619	Wang 2021	Protective effect and mechanism of Schistosoma japonicum soluble egg antigen against type 1 diabetes in NOD mice	Schistosoma species		Wang, 2021, International Journal of Diabetes in Developing Countries	animal study	China	Female BALB/c and NOD mice	unclear	T1DM	Compared with those of the NOD group, the blood glucose level and percentage incidence of diabetes in NOD mice treated with SEA decreased significantly; none of the mice injected with SEA developed T1DM while 70% receiving placebo had diabetes at 25 weeks of age in NOD mice	n/a
11452	Kingery 2021	Schistosomiasis and cardiovascular disease in 1,000 HIV-infected and uninfected Tanzanian adults: A prospective cohort study	Schistosoma species		Kingery, 2021, Circulation (abstract only)	prospective cohort	Tanzania	HIV-infected and HIV-uninfected adults	1000	hypertension, myocardial diastolic function, lipids	Schistosome infection was significantly associated with a lower prevalence of hypertension (39.6% vs 46.7%, p=0.016), myocardial diastolic dysfunction (8.1% vs 13.4%, p=0.015) and total-to-high density lipoprotein ratio (1.77 vs 1.82, p<0.0001) as compared to uninfected participants. Additionally, schistosome-infection was associated with significantly improved change in blood pressure over time …	n/a
11415	Yang 2021	Therapeutic Effect of Schistosoma japonicum Cystatin on Atherosclerotic Renal Damage	Schistosoma japonicum		Yang, 2021, Frontiers in Cell and Developmental Biology	animal study	China	ApoE-deficient C57BL/6 mice exposed to rSj-Cys	24	atherosclerosis, lipids,	Significantly decreased atherosclerotic plaque on entire aorta* and aortic sinus; significantly decreased fat deposition in kidney; and significantly decreased glomerular damage, and improved blood flow of the heart (↓ peak velocity and mean gradient of ascending aorta) associated with exposure to rSj-Cys in mice fed high-fat diet vs. unexposed mice fed high-fat diet; this was also seen with lipi…	n/a
11413	Talukder 2022	The Association between Diabetes and Human T-Cell Leukaemia Virus Type-1 (HTLV-1) with Strongyloides stercoralis: Results of a Community-Based, Cross-Sectional Survey in Central Australia	Strongyloides stercoralis		Talukder, 2022, International Journal of Environmental Research and Public Health	cross-sectional	Australia	Aboriginal participants with and without Strongyloides seropositivity (IgG antibody)	536	diabetes prevalence	Strongyloides seropositive individuals had a decreased odds of diabetes (aOR 0.58, 95% CI 0.35, 1.00; p = 0.049) but this was lost when BMI was included in the model	n/a
11338	PrayGod 2022	The association of Schistosoma and geohelminth infections with beta-cell function and insulin resistance among HIV-infected and HIV-uninfected adults: A cross-sectional study in Tanzania.	Mixed helminths	Schistosoma spp and geohelminths	PrayGod, 2022, PLOS ONE	cross-sectional	Tanzania	Adults with and without HIV +/- mixed helminth infections	1718	diabetes measures (glucose/insulin levels, hemoglobin A1c, HOMA-IR) and anthropometry/body composition	HIV-infected: No difference in HbA1c or fasting glucose, regardless of helminth infection or ART status HIV-uninfected: decreased HbA1c* (5.2% vs. 5.5%) in those with STH vs. uninfected but not with schistosome infection; no difference in fasting glucose	n/a
11335	Almugadam 2021	Association of urogenital and intestinal parasitic infections with type 2 diabetes individuals: a comparative study	Mixed helminths	Schistosoma haematobium and intestinal parasites	Almugadam, 2021, BMC Infectious Diseases	case-control	Sudan	Human participants with and without T2DM stratified by frequency of urogenital schistosomiasis and/or intestinal parasitic disease	300	T2DM	participants with T2DM had an increased odds of testing positive for urogenital schistosomiasis or intestinal parasites; intensity of S. haematobium infection (R=0.666, p=0.009) was correlated with duration of T2DM	n/a
11328	Zou 2021	Association of previous schistosome infection with fatty liver and coronary heart disease: A cross-sectional study in china	Schistosoma species		Zou, 2021, Parasite Immunology	cross-sectional	China	Adults with and without a history of PSI	2867	prevalence of CAD, hypertension, and diabetes; also measured BMI	No difference in diabetes (19.2% vs. 22.4% in those with PSI vs. without PSI, p=0.063) but PSI was significantly negatively associated with CAD. No difference in BMI or prevalence of hypertension.	n/a
10204	Mousa 1975	Lipid pattern in bilharzial hepatic fibrosis	Schistosoma species		Mousa, 1975, Egyptian Journal of Bilharziasis	cross-sectional	Egypt	Male participants with and without bilharzial hepatic fibrosis	82	total cholesterol and triglyceride	Total cholesterol was significantly lower in individuals with bilharzial hepatic fibrosis (p<0.001 in moderate and late cases, p<0.01 in mixed cases); only moderate and late fibrosis cases had decreased TGs compared to controls (p<0.01 and p<0.001, respectively).	n/a
10102	Lund 2012	Secreted molecules from the helminth parasite fasciola hepatica prevents pro-inflammatory immune responses to prevent autoimmune diabetes	Fasciola hepatic		Lund, 2012, Transplantation	animal study	unclear, possibly Australia	Female NOD mice exposed to excretory/secretory (ES) products of Fasciola hepatica vs. PBS treatment	unclear	autoimmune diabetes and inflammatory response	Soluble products secreted by F. hepatica prevented the development of antigen-specific inflammatory responses, thereby preventing the development of autoimmunity in a murine model of T1DM (prevented DM in 80-86% of animals vs. 10-15% of NOD mice treated with PBS)--unclear statistical significance in provided abstract.	n/a
9384	Tenaguem 2010	Cardiac Lesions In An Area Hyperendemic For Loiasis In Cameroon	Loa loa		Tenaguem, 2010, American Journal of Tropical Medicine and Hygiene	cross-sectional	Cameroon	Human participants with and without detectable Loa microfilaremia	297	echocardiographic findings of endomyocardial fibrosis	Echocardiography was abnormal in a high percentage (84.5%) of patients and included valvular or endocardial calcifications (70%), diastolic dysfunction (35.7%), cavity dilatation (34.3%), valvular insufficiency (18.5%), left ventricular hypertrophy (9.8%), pericardial lesions (2.4%) and EMF (1.01%). However, the frequency and distribution of these abnormalities were not statistically different be…	n/a
8067	Fairfax 2020	Sex specific Schistosomiasis induced metabolic modulation of the myeloid lineage	Schistosoma mansoni		Fairfax, 2020, The Journal of Immunology	animal study	U.S.	ApoE-/- mice with and without S. mansoni infection (cercariae)	unclear	weight gain and glucose intolerance	Female infected mice were not protected against weight gain and glucose intolerance, while infected males were protected (unclear significance from abstract)	n/a
7037	Sun 2014	Effects of Schistosoma japonicum infection on the expression of Arg-1 and Fizz-1 proteins in liver tissues of mice with high-fat diet induced obesity	Schistosoma japonicum		Sun, 2014, Chinese Journal of Microbiology and Immunology	animal study	China	Male C57BL/6J mice were randomly divided into 3 groups including normal control group (NC group, n=12), high-fat diet feeding group (HF group, n=12) and high-fat diet feeding with Schistosoma japonicum infection group (HSj group, n=12).	36	levels of fasting blood glucose (FBG), fasting plasma insulin (FINS), and homeostasis model assessment for insulin resistance index (HOMA-IR)	The mice from HF group showed higher levels of HOMA-IR than those forms NC group and HSj group by the end of 6 and 12 weeks after infection (P﹤0.05). The levels of HOMA-IR in mice from the HF group were increased by the end of week 12 after infection as compared with those at week 6 (P>0.05). The chronic infection of Schistosoma japonicum cercariae (12 weeks) might be helpful in reversing hepatic…	n/a
6717	Chaidee 2016	Opisthorchis viverrini infection exacerbates the severity of diabetic liver injury and non-alcoholic fatty liver disease	Opisthorchis viverrini		Chaidee, 2016, Am J Trop Med Hyg	animal study	Thailand	Hamsters with and without O. viverrini infection	68	blood glucose, insulin resistance	O. viverrini infection improved insulin sensitivity but may represent a risk factor for NAFLD (unclear significance)	n/a
5808	Zaki 1980	Plasma insulin; insulin resistance and glucose intolerance in children with bilharzial hepatic fibrosis.	Schistosoma species		Zaki, 1980, Hepato-Gastroenterology	cross-sectional	Egypt	Children (aged 10-15 years) with and without bilharzial hepatic fibrosis (BHF)	30	glucose tolerance, plasma insulin levels	The fasting blood sugar and plasma free fatty acid levels were not different in bilharzial and healthy children. The glucose disappearance rate (K) was significantly decreased in bilharzial children (p<0.05). Plasma insulin levels in children with BHF were higher in the fasting state and 60 min after glucose infusion than in healthy children.	n/a
5720	Coutinho-Abath 1965	[Biochemical changes in human mansonic schistosomiasis, with special reference to lipid metabolism].	Schistosoma mansoni		Coutinho-Abath, 1965, Revista brasileira de malariologia e doencas tropicais. Publicacoes avulsas	cross-sectional	Brazil	Human participants with and without S. mansoni infection ("pure" schistosomiasis vs. hepatointestinal vs. hepatosplenic)	72	serum lipids	Individuals with hepatosplenic schistosomiasis had decreased serum total lipids compared to other groups. People with hepatointestinal schistosomiasis had normal lipid levels (unclear significance)	n/a
5637	Owen 1978	Effect of experimental schistosomiasis mansoni on plasma and erythrocyte lipids and on plasma lecithin: cholesterol acyltransferase in the mouse.	Schistosoma mansoni		Owen, 1978, Revista brasileira de biologia	animal study	unclear, possibly Brazil	Male Swiss mice with and without S. mansoni infection (cercariae)	16	plasma total cholesterol, triglyceride	Plasma total cholesterol were significantly lower in infected mice than uninfected mice (p<0.001).	n/a
5626	Gillett 1978	Schistosoma mansoni: a comparative study of plasma and erythrocyte lipid alterations in the experimentally infected mouse and in selected human patients.	Schistosoma mansoni		Gillett, 1978, Experimental Parasitology	mixed human/animal study, cross-sectional	Brazil	Humans and mice with and without S. mansoni infection	unclear, possibly 60	total cholesterol	Infected human participants had significantly lower total cholesterol than their uninfected counterparts (in human, significance seen in only infected decompensated hepatic patients, p<0.001 (cholesterol of infected men = 3.07 +/- 0.33 vs 3.33 +/-0.15 for normal men). Infected mice had higher total cholesterol, not significant.	n/a
5597	Wilkins 1977	Schistosoma haematobium in a Gambian community. III. The prevalence of bacteriuria and of hypertension.	Schistosoma haematobium		Wilkins, 1977, Annals of Tropical Medicine & Parasitology	cross-sectional	The Gambia	Human participants from villages endemic for S. hematobium vs. not endemic for S. hematobium	572	blood pressure	Males and females from endemic areas had a slightly higher mean BP than those not living in endemic areas. For systolic pressure this showed the age and age^2 coefficients to be significantly different in the two areas (p < 0.02 and < 0.05 respectively), thus confirming an age dependent difference between the two areas. Overall mean diastolic pressures were 3 mm higher in the endemic area when ot…	n/a
5571	el-Badry 1976	Plasma immunoreactive insulin (IRI) and glucose tolerance in bilharzial hepatic fibrosis.	Schistosoma species		el-Badry	cross-sectional	Egypt	Human participants with and without bilharzial hepatic fibrosis	33	serum glucose and insulin resistance	Bilharzial hepatic fibrosis is associated with insulin resistance (unclear if significant and to what degree, though in figure 3, the authors claim that "all values denote statistically significant variation)	n/a
5553	Gillett 1976	Plasma free and esterfied cholesterol in schistosomiasis mansoni.	Schistosoma mansoni		Gillett, 1976, The Lancet	cross-sectional	Brazil	Human participants with and without S. mansoni infection	93	total cholesterol	Infected individuals (compensated, p<0.01, and decompensated hepatosplenic schistosomiasis, p<0.001) had significantly lower cholesterol than uninfected people.	n/a
5489	Gabr 1973	Serum lipids in bilharzial hepatic fibrosis.	Schistosoma species		Gabr, 1973, Acta biologica et medica Germanica	cross-sectional	unclear, possibly UAR	Human participants with and without schistosome infection (bilharzial hepatic fibrosis)	66	lipid profile	Those with bilharzial hepatic fibrosis had significantly lower total cholesterol (p<0.0005) and triglycerides (p<0.01) than uninfected people.	n/a
5478	Nofal 1973	Immunoreactive insulin in schistosomal hepatic fibrosis.	Schistosoma species		Nofal, 1973, The Journal of Tropical Medicine and Hygiene	cross-sectional	Egypt	Male participants with and without schistosomal hepatic fibrosis (verified by liver biopsy in patients with SHF)	17	insulin response to intravenous glucose administration	In patients with schistosomal hepatic fibrosis, the fasting blood glucose levels were normal, but the glucose disappearance rate (Kg value) was significantly slower than in the controls (p<0.01) with associated hyperinsulinemia, suggesting more insulin resistance.	n/a
5456	Gad-el-Mawla 1972	Plasma lipids and lipoproteins in bilharzial females during oral contraceptive therapy.	Schistosoma species		Gad-el-Mawla, 1972, The Journal of the Egyptian Medical Association	cross-sectional	Egypt	Women with and without history of bilharziasis + with and without use of contraceptive pills	64	total cholesterol	Both infected (p<0.0125) and uninfected individuals (p<0.0005) receiving contraceptive pills had higher total cholesterol than those not receiving contraceptive pills. In women not on contraception, those without a history of infection had lower total cholesterol than those with a history of infection.	n/a
5432	Carlisle 1972	Immunoglobulins and antibody to Loa loa in Nigerians with endomyocardial fibrosis and other heart diseases.	Loa loa		Carlisle, 1972, British Heart Journal	cross-sectional	Nigeria	Prevalence of antibodies to Loa Loa among human participants with endomyocardial fibrosis vs. other organic heart disease	83	association of Loa loa antibodies among patients with endomyocardial fibrosis and other heart diseases	no significant difference of serum immunoglobulins among the different groups	n/a
5420	Singh 1971	Serum proteins and lipids changes in ankylostomiasis before and after treatment.	Ancylostoma duodenale		Singh, 1971, The Indian Journal of Medical Research	cross-sectional	India	Human participants with and without ancylostoma infection (further stratified into individuals with and without anemia)	65	total cholesterol	Infected individuals had significantly lower total cholesterol than uninfected individuals (p<0.01) at baseline/on admission. After treatment of the hookworm infection, only those initially with hookworm infection and without anemia saw a significant rise in their total cholesterol (p<0.01). Treatment of anemia (with parenteral iron) in groups with baseline infection and anemia led to a significa…	as above
5417	Buck 1971	Microfilaruria in onchocerciasis. A clinical and epidemiological follow-up study in the Republic of Chad.	Onchocerca volvulus		Buck, 197, Bull. Wld Hlth Org.	cross-sectional	Republic of Chad	Human participants with and without microfilaruria	153	systolic blood pressure, serum cholesterol, weight:height ratio	Those with microfilariae in the urine had low weight:height ratio and reduced systolic blood pressure compared to those without microfilariae in the urine but these observations do not appear to be statistically significant. Those with microfilaruria also had higher serum cholesterol than those without microfilaruria, but this was not statistically significant.	n/a
5383	Ghanem 1970	Lipid metabolism in bilharzial cirrhosis.	Schistosoma species		Ghanem, 1970, Atherosclerosis	cross-sectional	Egypt	Human participants with and without bilharzial hepatic fibrosis +/- ascites	108	total cholesterol and triglyceride	Individuals with bilharzial hepatic fibrosis had significantly lower total cholesterol (BHF with ascites and without ascites, both p<0.01) and triglycerides (BHF with ascites, p<0.01; BHF without ascites p<0.05) than controls.	n/a
5318	SHALABY 1963	Incidence of atherosclerosis, hypertension & myocardial infarction in bilharzial cirrhosis.	Schistosoma species		Shalaby, 1963, The Journal of the Egyptian Medical Association	post-mortem/autopsy study	Egypt	Human autopsy cases to measure observe certain clinical findings in cases of bilharzial hepatosplenomegaly	571 autopsies but only 54 with bilharzial cirrhosis	myocardial infarction, hypertension, and atherosclerosis	Bilharzial cirrhosis was associated with lower frequency of myocardial infarction (p<0.001), hypertension (p<0.01), and atherosclerosis (p<0.03) compared to all other autopsy cases, but ? no different from other cases of cirrhosis.	n/a
5277	ATA 1958	Statistical study of hypertension in bilharzial cirrhosis.	Schistosoma species		Ata, 1958, Zeitschrift fur Tropenmedizin und Parasitologie	cross-sectional	Egypt	Human participants with bilharzial liver cirrhosis	508	hypertension prevalence	Hypertension is less likely to occur in patients with BHF than in normal individuals (unclear significance)	n/a
5211	Sanya 2020	Contrasting impact of rural, versus urban, living on glucose metabolism and blood pressure in Uganda.	Mixed helminths	Schistosoma mansoni, Trichuris, Ascaris, Strongyloides	Sanya, 2020, Wellcome Open Research	cross-sectional	Uganda	Human participants living in rural vs. urban setting to compare the cardiometabolic parameters of these individuals	2828	insulin resistance (using homeostatic model assessment of insulin resistance [HOMA-IR]), fasting blood glucose, fasting blood lipids, blood pressure, BMI	Adjusting for BMI, exercise, smoking, alcohol intake, age and sex, urban residents had lower mean fasting glucose (adjusted mean difference [95%CI] 0.18 [-0.32, -0.05] p=0.01) and HOMA-IR (-0.26 [-0.40, -0.11] p=0.001) but higher blood pressure (systolic, 5.45 [3.75,7.15] p<0.001; diastolic, 1.93 [0.57, 3.29] p=0.006). Current helminth infection did not explain for differences in BP and glucose m…	n/a
4970	Wolde 2019	Inverse Associations of Schistosoma mansoni Infection and Metabolic Syndromes in Humans: A Cross-Sectional Study in Northeast Ethiopia.	Schistosoma mansoni		Wolde, 2019, Microbiology insights	cross-sectional	Ethiopia	Human participants with and without S. mansoni infection (stool Kato-Katz thick smear technique00one wet mount and two Kato-Katz slides for each participant). Participants were recruited from two villages in Northeast Ethiopia: Kemise (endemic) and Kombolcha (nonendemic(,	181	components of metabolic syndrome: fasting blood glucose, lipid profile, insulin level, blood pressure, BMI	S. mansoni infected participants (n=41; all from Kemise) had significantly lower levels of fasting blood sugar, low prevalence of dyslipidemia (at least one or more abnormal lipid profile tests; total cholesterol, LDL-C, HDL-C, and triglycerides) as compared with controls (n=79 in Kemise and 61 in Kombolcha) (p<0.05 for all significant findings). Results from logistic regression analysis demonstr…	n/a
4888	Mohamed 2017	RELATION BETWEEN SCHISTOSOME PAST INFECTION AND METABOLIC SYNDROME.	Schistosoma species		Mohamed, 2017, Journal of the Egyptian Society of Parasitology	cross-sectional	Egypt	Human participants with and without previous schistosome infection	574	BMI, blood pressure, fasting blood glucose, HDL-C, triglyceride levels, and metabolic syndrome	There was significantly (p<0.05) lower BMI and waist circumference in PSI group (29.7±6.19 & 104.5±16.8 vs. 31.4±6.92 & 109±19.12 respectively) compared with the control group. Individuals with PSI had highly significantly (P<0.001) lower TG compared with control group (120.4±29.59 & 133±30.52 respectively). FBG levels were lower in PSI group than in the control ones( 105.8±23.1 & 107.8±26.36 res…	n/a
4761	Zhang 2012	[Anti-atherogenic effect and its mechanisms of soluble egg antigen of Schistosomia japonicum in ApoE-/- mice].	Schistosoma japonicum		Zhang, 2012, Zhongguo xue xi chong bing fang zhi za zhi = Chinese Journal of Schistosomiasis Control	animal study	China	ApoE-/- mice were divided into an experimental group one and group two. Group one mice were divided into a prevention and a control subgroup that were fed with high fat diet since the first week; the mice in the former subgroup were injected intraperitoneally with SEA while those in the latter one were injected with phosphate buffered saline (PBS) with 1 week interval for 4 times. Group two mice …	unclear	cholesterol level and measurement of atherosclerosis plaque area of the aorta	Immunization with SEA led to a significant reduction in the levels of cholesterol in all ApoE-/- mice (though unclear what the p-value is in the abstract). The atherosclerosis plaque area of aorta of ApoE-/- mice in the prevention subgroup was reduced, while there was no significant change in the treatment subgroup.	n/a
4422	Xue 2014	[Effect of Schistosoma japonicum infection on serum lipid status in mice].	Schistosoma japonicum		Xue, 2014, Chinese Journal of Parasitology & Parasitic Diseases	animal study	China	ICR mice with and without S. japonicum infection (double sex cercariae, single sex cercariae, eggs, or SEA) that were fed either a high-fat or normal diet. At 42 days post-infection, the mice were sacrificed and the sera were collected. Other 36 ICR mice were randomly divided into three groups fed on normal diet. Mice in the first group were infected with S. japonicum single-sex cercariae via abd…	24	lipid profile	Compared with the uninfected controls, the serum levels of total cholesterol, triglyceride, HDL-C, and LDL-C decreased significantly in double-sex cercariae infected-mice fed on a high fat diet or a normal diet (P < 0.05). In HFD group, serum TC[(1.45 +/- 0.31) mmol/L], TG [(0.17 +/- 0.06)mmol/L], HDL [(1.11 +/- 0.26) mmol/L] and LDL [(0.44 +/- 0.15)mmol/L] levels in mice infected with double-sex…	n/a
4336	Ramos 2004	[Alterations in cholesterol, triglyceride and total phospholipid levels in plasma of Callithrix jacchus (sagui) reinfected by Schistosoma mansoni].	Schistosoma mansoni		Ramos, 2004, Revista da Sociedade Brasileira de Medicina Tropical	animal study	Brazil	Non-human primates (Callithrix jacchus) infected and re-infected with S. mansoni (with blood work done before infection and 60 days after infection and reinfection).	11	total cholesterol and triglyceride	There were significant reductions in plasma total cholesterol (p=0.0005) and triglycerides (0=0.000007) in animals reinfected by S. mansoni in comparison to the same animals prior to and after one infection.	n/a
4177	El-Shazly 2008	Biochemical parameters in chronic fascioliasis.	Fasciola species		El-Shazly, 2008, Journal of the Egyptian Society of Parasitology	cross-sectional	Egypt	Human participants with and without Fasciola infection (stool microscopy)	69	lipid profile	TC (p<0.001), HDL (p<0.001), and LD (p<0.001) significantly decreased with higher intensities of infection as compared to controls. Triglycerides showed significant increases parallel to infection intensity as compared to controls (p<0.001).	n/a
4082	Ryoji 1997	The relation between serum fatty acids and soil-transmitted helminthiasis in the Philippines.	Mixed helminths	Ascaris lumbricoides, Trichuris trichiura	Ryoji, 1997, The Southeast Asian Journal of Tropical Medicine and Public Health	cross-sectional	Phillipines	Female participants with positive for Ascaris lumbricoides and Trichuris trichiura eggs on stool microscopy (Kato-Katz technique) vs. non-infected group (? from another study in 1993)	32	total cholesterol	infected individuals had lower total cholesterol but this did not appear to be significant	n/a
4016	Osman 1995	Studies of human fasciolosis in Egypt: some serum lipid parameters before and after treatment.	Fasciola species		Osman, 1995, Journal of the Egyptian Society of Parasitology	prospective cohort	unclear, possibly Egypt	Human participants with and without fasciolosis (diagnosed by Kato-Katz stool examination).	20	lipid profile	Infected individuals had significantly higher mean triglycerides and lower mean total cholesterol, HDL, and LDL at baseline when compared to uninfected individuals; with treatment, the mean total cholesterol, HDL, and LDL significantly increased among infected individuals, whereas the mean triglyceride level significantly decreased. Of note, there was no mentioning of p-values or any methods of a…	as above
3977	Hong 1994	Liver function in Clonorchis sinensis-infected rabbits.	Clonorchis sinensis		Hong, 1994, The Korean Journal of Parasitology	animal study	Republic of Korea	Rabbits infected with Clonorchis sinensis (metacercariae) and divided into group I (infected with less than 100 flukes) and group II (infected by 100-250 flukes).	9	total cholesterol	Infected animals had increased serum cholesterol level from 8 weeks which peaked at 16 weeks after infection , then decreased to control level thereafter (p<0.05).	n/a
3849	El-Wakil 2002	Effect of schistosoma mansoni egg deposition on multiple low doses streptozotocin induced insulin dependent diabetes.	Schistosoma mansoni		El-Wakil, 2002, Journal of the Egyptian Society of Parasitology	animal study	Egypt	Streptozotocin-induced mice (C57BL/6J) with and without S. mansoni infection (cercariae)	30	blood glucose, pancreatic histopathology	STZ treated mice who were then infected with S. mansoni had a significantly reduced elevation in blood glucose from 7 days post STZ (p<0.001) and less pancreatic tissue degeneration on day 21 than in uninfected mice (p<0.05).	n/a
3472	Shaheen 1989	Effect of praziquantel on some aspects of carbohydrate metabolism in mice infected with Schistosoma mansoni.	Schistosoma mansoni		Shaheen, Pharmacological Research, 1989	animal study	Egypt	Male Swiss mice with and without S. mansoni infection (cercariae) fed standard diet. All animals (including controls) were then treated with praziquantel.	unclear	blood glucose	infected mice had lower blood glucose than uninfected mice at 7 weeks (p<0.05). PZQ treatment increased blood glucose at 7 and 14 days post-treatment in infected mice (p<0.001).	as above
3451	Mansour 1988	Evaluation of serum HDL cholesterol fraction in bilharzial infection, infective hepatitis and obstructive jaundice.	Schistosoma species		Mansour, 1988, Journal of the Egyptian Society of Parasitology	cross-sectional	Egypt	Human participants with and without S. haematobium or S. mansoni hepatosplenomegaly (included 10 controls, and 10 cases of infective hepatitis and 10 cases of obstructive jaundice)	77	total cholesterol and HDL	Schistosome infection had no effect on total cholesterol or HDL (compared to normal individuals, those with infective hepatitis, and obstructive jaundice).	n/a
3445	Changbumrung 1988	Lipid composition of serum lipoprotein in opisthorchiasis.	Opisthorchis viverrini		Changbumrung, 1988, Annals of Tropical Medicine and Parasitology	cross-sectional	Thailand	Human participants with and without O. viverrini infection	42	lipid profile and BP	Among the two groups, BP was similar; infected individuals had lower total cholesterol (p<0.05) and higher triglycerides (not significant) than uninfected individuals.	n/a
3272	Pricoli 1981	[Blood glucose level in hepato-intestinal schistosomiasis].	Schistosoma species		Pricoli, 1981, Arquivos de gastroenterologia	cross-sectional	Brazil	Human participants with and without hepato-intestinal schistosomiasis	60	glucose, insulin resistance	The mean value of glycemia in infected group was superior. However, none of these patients showed a diabetic G.T.T. curve (unclear statistical significance	n/a
3112	Bibawi 1970	Schistosomiasis and Diabetes Mellitus	Schistosoma mansoni		Bibawi, 1970, Transactions of the Royal Society of Tropical Medicine and Hygiene	cross-sectional	Egypt	Human participants with and without schistosomal hepatic fibrosis	390	oral glucose tolerance test, prediabetes	The incidence of frank and subclinical diabetes did not different significantly between the two groups. Prediabetes, however, was more prevalent in infected individuals than controls (unclear significance).	n/a
3083	Chen 2013	Association of Previous Schistosome Infection With Diabetes and Metabolic Syndrome: A Cross-Sectional Study in Rural China	Schistosoma species		Chen, 2013, J Clin Endocrinol Metab	cross-sectional	China	Humans with diabetes and with and without previous schistosome infection (PSI)	3913	Diabetes: hemoglobin A1c, blood glucose, insulin resistance; metabolic syndrome	Inverse association between PSI and diabetes , metabolic syndrome (both p<0.001)	n/a
3031	Cooke 1999	Infection with Schistosoma mansoni prevents insulin dependent diabetes mellitus in non-obese diabetic mice	Schistosoma mansoni		Cooke, 1999, Parasite Immunology	animal study	UK	Female NOD mice with and without S. mansoni infection (cercariae)--two experiments (one had mice injected i.p. with 50 cercariae and the second with mice infected with 30 cercariae administered percutaneously).	unclear, possibly 36	IDDM	Infection significantly reduced the spontaneous incidence of IDDM in NOD mice in both experiments (p=0.024 and p=0.012, respectively).	n/a
3007	Cortes-Selva 2018	Schistosoma mansoni Infection-Induced Transcriptional Changes in Hepatic Macrophage Metabolism Correlate With an Athero-Protective Phenotype	Schistosoma mansoni		Cortes-Selva, 2018, Frontiers in Immunology	animal study	United States	ApoE-/- mice with and without S. mansoni infection (cercariae) being fed standard chow and high fat diet	unclear	glucose tolerance, aortic plaque area	Male ApoE null mice fed a HFD in combination with S. mansoni infection had reduced plaque area (p<0.0001), reduced total cholesterol (p<0.0001) and increased glucose tolerance (unclear, but per methods, likely p<0.05).	n/a
2961	daSilva 2018	Alterations in the lipid profiles and circulating liver enzymes in individuals infected by Schistosoma mansoni	Schistosoma mansoni		da Silva, 2018, Rev Soc Bras Med Trop	cross-sectional	Brazil	Human participants with S. mansoni infection (based on Lutz and/or Kato-Katz technique)	1078	lipid profile	S. mansoni infection was a protective factor against increased levels of triglycerides, cholesterol, and HDL (by age: p<0.01 for all outcomes in adults aged 19 years or older; Tri (OR 0.73; 95% CI 0.61–0.95; p = 0.01), total cholesterol (OR 0.57; 95% CI 0.47–0.70; p < 0.01).	n/a
2866	Afshan 2020	Seroepidemiology of human fascioliasis and its relationship with anti-Fasciola IgG and liver enzymes as biomarkers of pathogenicity	Fasciola species		Afshan, 2020, African Health Sciences	cross-sectional	Pakistan	Human participants with positive and negative Fasciola IgG antibodies	546 screened but biochemical tests ran on infected group (n=80) and control group (n=20)	serum cholesterol and glucose levels	Cholesterol levels were more significantly elevated in patients with positive Fasciola IgG than those without (p<0.0001). The study also showed very small increase in serum glucose level in infected group, while no significant (p>0.05) difference was found when comparing fascioliasis positive group with controls.	n/a
2810	Amdare 2017	Therapeutic potential of the immunomodulatory proteins Wuchereria bancrofti L2 and Brugia malayi abundant larval transcript 2 against streptozotocin-induced type 1 diabetes in mice	Mixed filarial species		Amdare, 2016, Journal of Helminthology	animal study	India	Female BALB/c mice (6-8 weeks of age) with induced T1DM (using streptozotocin) divided into a control group and those treated with various combinations of recombinant Wuchereria bancrofti L2 (rWbL2) and Brugia malayi abundant larval transcript 2 (rBmALT-2)	unclear but approximately 36-48	T1DM	Treatment with the filiarial proteins (either individually or in combination) lowered blood glucose levels and reduced the incidence of T1DM in mice (but did not appear statistically, except for glucose). The anti-diabetic effect of these proteins was also reflected in histopathological observations of the pancreatic tissue of treated diabetic mice, which showed a higher number of healthy islets …	as above
2770	Aravindhan 2012	Effect of Filarial Infection on Serum Inflammatory and Atherogenic Biomarkers in Coronary Artery Disease (CURES-121)	Mixed filarial species		Aravindhan, 2012, American Journal of Tropical Medicine and Hygiene	cross-sectional	India	Human participants recruited from the Chennai Urban Rural Epidemiology Study (CURES) and divided into those with CAD (diagnosed by medical history and/or EKG changes) and controls, then determining the prevalence of positive LF by quantification of filarial antigen or anti-filarial antibody titer.	453	Prevalence of LF positivity among pts with and without CAD. Lipid profiles, hsCRP, and carotid IMT also examined between the two groups.	No association between LF and CAD prevalence. Additionally within the CAD+ group, there was no clear difference in hsCRP or IMT between LF+ and LF- subjects.	n/a
2769	Aravindhan 2010	Decreased Prevalence of Lymphatic Filariasis among Diabetic Subjects Associated with a Diminished Pro-Inflammatory Cytokine Response (CURES 83)	Mixed filarial species		Aravindhan, 2010, PLOS NTD	cross-sectional	India	Human participants with T2DM and with and without sero-positivity for lymphatic filariasis	1416	T2DM prevalence	Inverse relationship between sero-positivity for lymphatic filariasis and T2DM (prevalence of 10.4% of LF in the normal glucose tolerance (NGT) group, 9.1% in the impaired glucose tolerance (IGT) group, 5.7% in the newly-diagnosed type-2 diabetes (ND-DM) group, and 4.3% in the known type-2 diabetes group under treatment (KDM) (p=0.0095).	n/a
2768	Aravindhan 2010	Decreased Prevalence of Lymphatic Filariasis Among Subjects with Type-1 Diabetes	Mixed filarial species		Aravindhan, 2010, American Journal of Tropical Medicine and Hygiene	cross-sectional	India	Human participants with T2DM and with and without sero-positivity for lymphatic filariasis	762	association between LF positivity and T1DM	inverse relationship between LF and T1DM prevalence (2% LF positivity in the T1DM group vs. 14% in the normal glucose tolerance group, p<0.001).	n/a
2746	Assaadkhalil 1992	Immuno-Metabolic Factors in Schistosomal Hepatic-Fibrosis Modulating Atherogenesis	Schistosoma species		Assaadkhalil, 1992, Ann Biol Clin	cross-sectional	not disclosed	Human participants with schistosomal hepatic fibrosis (SHF) vs. non-schistosomal subjects	51	lipid profile	Those with SHF had significantly better lipid profiles (lower TC, TG, and higher HDL, though unclear p value) than normal controls.	n/a
2649	Filomeno 2020	The acute schistosomiasis mansoni ameliorates metabolic syndrome in the C57BL/6 mouse model	Schistosoma mansoni		Filomeno, 2020, Experimental Parasitology	animal study	Brazil	Mice (C57BL/6) fed high-fat vs. standard chow without and without S. mansoni infection (cercariae)	33	body mass, lipid profile, blood glucose, and glucose tolerance	Infected mice fed high-fat chow had lower lipid levels, blood glucose, and improved glucose tolerance (p<0.001), and lower body mass than uninfected mice fed high-fat chow (others without clear statistical significance).	n/a
2536	Bychkov 2019	Hypereosinophilic Syndrome, Cardiomyopathies, and Sudden Cardiac Death in Superinvasive Opisthorchiasis	Opisthorchis species		Bychkov, 2019, Cardiology Research and Practice	post-mortem/autopsy study	Russia	Human participants who were treated in healthcare facilities treating opisthorchiasis patients with a hyperendemic focus	110	hypereosinophilic syndrome (HES), eosinophilic myocarditis	Those with invasive opisthorchiasis had cardiac changes, including eosinophilic myocarditis (not clear if statistically significant).	n/a
2501	Carranza-Rodriguez 2017	Endomyocardial involvement in asymptomatic sub-Saharan immigrants with helminth-related eosinophilia	Mixed helminths		Carranza-Rodriguez, 2017, PLOS NTD	cross-sectional	Spain	Human participants of sub-Saharan origin with and without eosinophilia and/or parasitosis	50	prevalence of endomyocardial clinical manifestations of eosinophilia	Significant association between presence of eosinophilia and cardiac structural alterations (posterior mitral leaflet thickening, p=0.002), but no association between degree of eosinophilia or type of parasite and cardiac valve involvement.	n/a
2413	Dessie 2020	Hematological and Biochemical Profile of Patients Infected with Schistosoma mansoni in Comparison with Apparently Healthy Individuals at Sanja Town, Northwest Ethiopia: A Cross-Sectional Study	Schistosoma mansoni		Dessie, 2020, Journal of Tropical Medicine	cross-sectional	Ethiopia	Human participants with (microscopically confirmed) and without S. mansoni infection	220	total cholesterol and blood glucose	Infected individuals had lower cholesterol than uninfected people (p<0.001). No differences in blood glucose were detected.	n/a
2390	Dimenstein 1992	Alterations in the Levels and Lipid-Composition of Plasma-Lipoproteins (Vldl, Ldl and Hdl) in Brazilian Patients with Hepatosplenic Schistosomiasis-Mansoni	Schistosoma mansoni		Dimenstein, 1992, Brazilian Journal of Medical and Biological Research	cross-sectional	Brazil	Human participants with (microbiologically confirmed) and without S. mansoni infection	28	lipid profile	Those with compensated hepatosplenic schistosomiasis had lower LDL and HDL than uninfected individuals (p<0.05 for LDL, unclear for HDL but possibly <0.05 or even more significant)	n/a
2376	Doenhoff 2002	An anti-atherogenic effect of Schistosoma mansoni infections in mice associated with a parasite-induced lowering of blood total cholesterol	Schistosoma mansoni		Doenhoff, 2002, Parasitology	animal study	UK	ApoE-/- mice with and without S. mansoni infection (percutaneous cercariae)	unclear	atherosclerotic lesions in aortic arch and brachiocephalic artery and serum lipid profile	The development of atherosclerotic lesions of the apoE (-\-) mice were reduced by approximately 50% in infected mice vs. uninfected mice. Additionally, infected mice on HFD had lower total cholesterol, HDL, and LDL than uninfected mice on HFD (all p<0.05).	n/a
2359	Duan 2018	Population based and animal study on the effects of Schistosoma japonicum infection in the regulation of host glucose homeostasis	Schistosoma japonicum		Duan, 2018, Acta Tropica	mixed human/animal study, cross-sectional	China	Human participants and mice (C57B/L6--infected with cercariae) with and without S. japonicum infection	2183 human subjects, unclear sample size of mice	BMI, serum glucose, total cholesterol, triglycerides, LDL-c, HDL-c	Human subjects with S. japonicum infection had significantly lower BMI (p=2.98 x10^-7), serum glucose (p=0.0003), total cholesterol (p=2.28x10^-73), triglycerides (p=0.0009), LDL-c (p=2.62x10^-13), and higher HDL (p=7.43x10^-26) than humans without infection. In mice (used to test the effects of infection on glucose tolerance), infection improved glucose tolerance and body weight (both p<0.05).	n/a
2308	Htun 2018	Association between gastrointestinal tract infections and glycated hemoglobin in school children of poor neighborhoods in Port Elizabeth, South Africa	Mixed helminths		Htun, 2018, PLOS Neglected Tropical Diseases	cross-sectional with follow-up treatment data (6-month anthelmintic treatment follow-up)	South Africa	School children (9- to 14-year-olds) with and without parasitic infection and/or Helicobacter pylori	842	Diabetes (hemoglobin A1c)	No association with helminths with diabetes among school children (except those with H pylori had positive association with hyperglycemia)	no statistically significant increase in hemoglobin A1c after anthelmintic treatment with albendazole.
2307	Htun 2018	Association between helminth infections and diabetes mellitus in adults from the Lao People's Democratic Republic: a cross-sectional study	Mixed helminths		Htun, 2018, Infectious Diseases of Poverty	cross-sectional	Laos	Human participants with different types of intestinal parasitic infections	1528	diabetes mellitus (hemoglobin A1c)	There was a positive association between Taenia spp. infection (beta = 0.117, 95% CI: 0.042-0.200) and DM risk (HbA1c; OR = 2.98; 95% CI: 1.10-8.05). No other helminth species was associated with glycated hemoglobin.	n/a
2275	Hussaarts 2015	Chronic helminth infection and helminth-derived egg antigens promote adipose tissue M2 macrophages and improve insulin sensitivity in obese mice	Schistosoma mansoni		Hussaarts, 2015, The FASEB Journal	animal study	The Netherlands	Male C57BL/6J mice with and without S. mansoni infection (SEA, cercariae) fed either low-fat or high-fat diet	unclear	insulin resistance and body weight	Infected mice had reduced body weight gain (-62%, p<0.05), fat mass gain (-89%, p<0.05), and adipocyte size (p<0.05) as well as lower insulin resistance (-23%, p<0.05) and glucose intolerance (-16%, p<0.05).	n/a
2215	El-Gebaly 2019	Immunomodulating effect of Schistosoma mansoni soluble egg antigen on course of induced diabetes mellitus in experimental mice	Schistosoma mansoni		El-Gebaly, 2019, Parasitologists United Journal	animal study	Egypt	Swiss Albino mice with and without S. mansoni infection (exposed to SEA; diabetes induced by injection with STZ)	90	blood glucose, diabetes	At 4 weeks, S. mansoni derived SEA was protective against T1DM--the SEA, curative, and protective groups had significantly lower blood glucose levels than the STZ group (p=0.000). No significant differences in the mean blood glucose was observed among control, SEA, and curative groups (STZ injected, followed. by three SEA doses).
2149	Farias 1997	Frequency and characteristics of arterial systemic hypertension in patients infected with Schistosoma mansoni	Schistosoma mansoni		Farias, 1997, Hypertension	cross-sectional	Brazil	Human participants with various clinical manifestations of S. mansoni: hepatointestinal (HI), hepatosplenic compensated (HSC), and hepatosplenic non-compensated (HSN)	186	hypertension	37% of S. mansoni-infected patients age 41 or older had arterial systemic hypertension (unclear significance from abstract)	n/a
2097	Ghanem 1971	Glucose Intolerance in Hepatic Schistosomiasis	Schistosoma species		Ghanem, 1971, Journal of Tropical Medicine and Hygiene	cross-sectional	Egypt	Human participants with and without hepatic schistosomiasis	143	glucose tolerance	Participants with hepatic schistosomiasis had more glucose intolerance than those without hepatic schistosomiasis (p<0.01)	n/a
2076	Goes 2012	Effects of high-fat chow on heart tissue in acute and chronic experimental murine schistosomiasis mansoni	Schistosoma mansoni		Goes, 2012, Parasitology	animal study	Brazil	Female Swiss Webster infected and uninfected mice that were fed either standard or high-fat chow	20	myocardial injury on histopathological examination	Myocardial tissue from infected mice fed high-fat chow showed myocarditis (higher cardiomyocyte hyperplasia, p<0.0001, and higher amounts of collagen, p<0.05, as compared to infected mice fed standard chow (control). Infected mice fed high-fat chow also showed significantly reduced numerical density and total number of myocytes than uninfected mice (p<0.05). The data supports the view that a doub…	n/a
2058	Gonzalez-Fernandez 2020	Identification of High-Risk Pregnancies in a Remote Setting Using Ambulatory Blood Pressure: The MINDI Cohort	Mixed helminths		Gonzalez-Fernandez, 2020, Frontiers in Public Health	cross-sectional	Panama	Pregnant women with different types of helminth infections	213	maternal blood pressure	Hookworm infection was associated with higher SBP (P = 0.049), DBP (P = 0.046) and MAP (P = 0.028). The presence of Trichuris (OR: 6.7, 95% CI 1.0-44.5) was associated with increased odds of elevated MAP. The odds of low BP was higher in the presence of Ascaris (OR: 3.63 +/- 2.28, P = 0.040).	n/a
2027	Kozat 2010	Glucose, Lipid, and Lipoprotein Levels in Sheep Naturally Infected with Fasciola hepatica	Fasciola hepatic		Kozat, 2010, Journal of Parasitology	animal study	Turkey	Sheep with and without F. hepatica infection (infection confirmed with stool microscopy)	25	lipid profile and glucose	At day 0 (prior to treatment) and on the 28th day (after treatment), the serum concentrations of glucose, total cholesterol, triglyceride, HDL, and LDL in infected sheep were significantly lower than those of uninfected sheep (per authors, "p values ranging from 0.01 to 0.001). At day 56 (after treatment), none of the variables was significantly different between control sheep and those that rece…	as above
1984	LaFlamme 2007	Chronic exposure to schistosome eggs reduces serum cholesterol but has no effect on atherosclerotic lesion development	Schistosoma mansoni		La Flamme, 2007, Parasite Immunology	animal study	New Zealand	ApoE-deficient C57BL/6 mice with (schistosome egg-exposed) and without (PBS-treated) S. mansoni infection fed high vs. low fat diet	unclear	lipid profile and aortic atherosclerotic lesion size	ApoE -/- mice fed a HFD exposed to schistosome eggs had lower total cholesterol and LDL (p<0.05) but no change in atherosclerotic lesion size when compared to unexposed mice. Overall, infected mice also had lower TC and LDL than uninfected mice (p<0.02 for treated vs. untreated animals).	n/a
1955	Laothong 2013	alpha-Tocopherol and lipid profiles in plasma and the expression of alpha-tocopherol-related molecules in the liver of Opisthorchis viverrini-infected hamsters	Opisthorchis viverrini		Laothong, 2013, Parasitology International	animal study	Thailand	Hamsters with and without O. viverrini (metacercariae)	60	lipid profile	LDL and cholesterol increased in the acute phase of infection (21 days-1 month; p>0.05), while triglyceride increased in the chronic phase (only certain time points were there statistical significance between the infected vs. uninfected hamsters--at 5 months, p<0.05; also triglyceride/cholesterol ratio at 5 months, p<0.05). HDL was significantly lower (p<0.05) throughout the phases of infection (…	n/a
1924	Muthukumar 2020	Effects of Opisthorchis viverrini infection on glucose and lipid profiles in human hosts: A cross-sectional and prospective follow-up study from Thailand	Opisthorchis viverrini		Muthukumar, 2020, Parasitology International	prospective cohort	Thailand	Human participants with and without O. viverrini infection	400	hemoglobin A1c, lipid profile, BMI, WC, blood pressure	At baseline, OV infected people had significantly lower A1c (5.5% vs. 6.01%, p=0.001) but higher HDL (54.07 vs. 49.46, p=0.001). After PZQ treatment of OV-positive subjects, A1c (p<0.05) and HDL (p<0.05) rose.There was no significant difference in blood pressure or BMI at baseline or after PZQ treatment between the two groups, but a significant rise in HDL and A1c.	as above
1733	Hays 2015	Does Strongyloides stercoralis infection protect against type 2 diabetes in humans? Evidence from Australian Aboriginal adults	Strongyloides stercoralis		Hays, 2015, Diabetes Research and Clinical Practice	cross-sectional	Australia	Human participants with and without prior S. stercoralis infection	259	hemoglobin A1c/diabetes, BMI, fasting lipids, blood pressure	Infection with S. stercoralis was associated with significantly reduced risk of T2DM in adults (adjusted OR = 0.39, 0.23-0.67, p=0.001)	n/a though pts were treated and followed up in a second study
1731	Hays 2017	The relationship between treatment for Strongyloides stercoralis infection and type 2 diabetes mellitus in an Australian Aboriginal population: A three-year cohort study	Strongyloides stercoralis		Hays, 2017, Diabetes Research and Clinical Practice	prospective cohort	Australia	Aboriginal adults with and without Strongyloides stercoralis and anthelmintic treatment	207	diabetes mellitus (hemoglobin A1c), BMI, random blood glucose	Demonstrated a differential effect of treatment for S. stercoralis on glucose metabolism in patients with and without T2DM. There was a significant effect on the development of T2DM and glucose intolerance in those without T2DM, and there was improvement of glycemic control in subjects with pre-existing T2DM when treated for Strongyloides compared to the non-treatment group (Diff -1.03, p = 0.009…	as above
1685	Ines 2017	Alterations in serum paraoxonase-1 activity and lipid profile in chronic alcoholic patients infected with Strongyloides stercoralis	Strongyloides stercoralis		Ines, 2016, Acta Tropica	cross-sectional	Brazil	Human participants with and without S. stercoralis infection (alcoholic vs. non-alcoholic)	276	lipid profile	S. stercoralis-infected alcoholic individuals had significantly lower levels of triglycerides, LDL-C, and VLDL-C than uninfected alcoholic individuals (p<0.05), while TC and HDL-C were higher in the infected group (not significant for both). Among non-alcoholics, infected individuals had significantly higher total cholesterol and LDL-C (both p<0.05) than uninfected individuals.	n/a
1572	McGuire 2019	Is Strongyloides seropositivity associated with diabetes mellitus? A retrospective case-control study in an East London NHS Trust	Strongyloides stercoralis		McGuire, 2019, Trans R Soc Trop Med Hyg	case-control	United Kingdom	Human participants with and without positive Strongyloides serology (cases and controls)	532	diabetes (defined as having had a glycated hemoglobinA1c (HbA1c) reading≥6.5%, or a random blood glucose>11.1mmol/liter, or a fasting blood glucose of>7.0 mmol/liter in the past or by being on treatment for diabetes).	Univariate logistic regression analysis demonstrated a significant association between Strongyloides seropositivity and diabetes (OR 3.52, 95% CI 2.19–5.66), p<0.001. In multivariate analysis, there remained a significant association between diabetes and Strongyloides seropositivity (OR 1.81, 95% CI 1.04–3.16), p=0.035.	n/a
1550	Mendonca 2006	Is there an association between positive Strongyloides stercoralis serology and diabetes mellitus?	Strongyloides stercoralis		Mendonca, 2006, Acta Tropica	case-control	Brazil	Human participants with and without T2DM (cases and controls)	120	frequency of association between positive Strongyloides stercoralis serology and diabetes	The frequency of positive S. stercoralis serology in diabetics was 23% versus 7.1% in the control group (p< 0.05). The odds ratio for diabetics was 3.9 (CI, 1.6–15.9, p< 0.05). Diabetic patients with HbA1c≤7 had a greater chance of testing negatively for S. stercoralis infection (OR: 1.5, p> 0.05).	n/a
1417	Kalantari 2019	Prevalence and Associated Risk Factors of Strongyloides sp. Infection in Diabetic Patients in the Central Part of Mazandaran, Northern Iran	Strongyloides stercoralis		Kalantari, 2019, Archives of Clinical Infectious Diseases	cross-sectional	Iran	Human diabetic participants with and without Strongyloides spp infection (stool sample for detection of larvae and serum samples for ELISA)	180	diabetes mellitus	There was a high seroprevalence (25.6%) of Strongyloides sp. infection in diabetic patients (n=46 for seropositive, n=7 for borderline, and n=127 for seronegative). However, this difference was not statistically significant.	n/a
1254	Li 2016	Incidence of insulin resistance and diabetes in patients with portosystemic shunts without liver dysfunction	Schistosoma japonicum		Li, 2016, Journal of International Medical Research	cross-sectional	China	Human participants with and without hepatosplenic S. japonicum (HSJ) infection (disease was confirmed by combining the findings of typical liver ultrasonography with the results of clinical tests and a history of infection; active schistosomiasis was diagnosed by positive Kato-Katz test, and these individuals were excluded).	82	BMI, lipid profile, insulin resistance	There was a positive correlation (r = 0.67; p< 0.05) between insulin resistance and participants with chronic HSJ and normal liver function with portal systemic shunts (PSS) (67% of the those participants had IR and 37% had diabetes. Compared with control subjects, those who were chronic HSJ patients with IR/diabetes had significantly higher total cholesterol, LDL-C, and A1c (all p<0.05); those w…	n/a
1232	Lira 2019	Superimposing a high-fat diet on Schistosoma mansoni infection affects renin-angiotensin system components in the mouse kidney	Schistosoma mansoni		Lira, 2019, Journal of the Brazilian Society of Tropical Medicine	animal study	Brazil	Female BALB/c mice with and without S. mansoni infection (cercariae) fed standard and high-fat diet	40	glucose, lipid profile	Infected animals had significantly lower levels of glucose, triglycerides, and HDL in animals with normal and high fat diet when compared to uninfected animals fed the same diets (all p<0.05). Infected animals fed high fat diet also had low weight at the last two weeks as compared to uninfected control diet, infected control diet, and uninfected high fat diet animals (p<0.05).	n/a
1200	Reddy 2017	Filarial Abundant Larval Transcript Protein ALT-2: An Immunomodulatory Therapeutic Agent for Type 1 Diabetes	Brugia malayi		Reddy, 2017, Indian Journal of Clinical Biochemistry	animal study	India	Female BALB/c mice with Streptozotocin-induced T1DM exposed vs. not exposed to a recombinant abundant larval transcript protein of Brugia malayi (rBmALT-2)	unclear, possibly 24-32	effect of rBmALT-2 on T1DM, glucose, histopathological examination of pancreatic tissue	The diabetic mice on treatment with rBmALT-2 showed a significant (p<0.0005) decrease in their fasting blood glucose levels. By the end of the second week after the initiation of treatment with the rBmALT-2, 28 % of the diabetic mice became normal and none of them were diabetic by the end of 5th week. The anti-diabetic effect of rBmALT-2 significantly correlated with the concomitant redressal of …	as above
1146	Lund 2016	A parasite-derived 68-mer peptide ameliorates autoimmune disease in murine models of Type 1 diabetes and multiple sclerosis	Fasciola hepatic		Lund, 2016, Scientific Reports	animal study	unclear, possibly Australia	NOD mice with and without exposure to F. hepatica antigens	unclear	prevention of T1DM	The parasitic peptide, FhHDM-1, prevented the development of T1DM in NOD mice (50% of mice treated with FhHDM-1 were protected against T1DM as compared to 84% of mice receiving PBS (control); p<0.0001)--and those mice remained normoglycemic at 30 weeks of age. Examination of H&E stained sections of pancreas isolated from FhHDM-1 treated mice at 13 weeks of age showed and consistent and significan…	n/a
1143	Lund 2014	Secreted Proteins from the Helminth Fasciola hepatica Inhibit the Initiation of Autoreactive T Cell Responses and Prevent Diabetes in the NOD Mouse	Fasciola hepatic		Lund, 2014, PLOS ONE	animal study	unclear, possibly Australia	Female NOD/Lt mice exposed to FhES peptide (F. hepatica) vs. PBS	unclear	Prevention of T1DM, effect on host inflammatory response/environment	FhES contains immune modulatory molecules that mediate protection against T1DM via induction and maintenance of a regulatory immune environment (84% of FhES-treated mice remained T1DM-free at 30 weeks of age, p<0.0001, as compated to only 19% of PBS-treated mice remaining disease-free at 30 weeks. Consistent with the ability of FhESt to prevent autoimmune diabetes, examination of H&E-stained sect…	n/a
1139	Luo 2017	Praziquantel treatment after Schistosoma japonicum infection maintains hepatic insulin sensitivity and improves glucose metabolism in mice	Schistosoma japonicum		Luo, 2017, Parasites & Vectors	animal study	China	Male C57BL/6 mice and the diabetes db mutation of the leptin receptor (Lepr db/db) mice were used in all experiments and were either exposed or not exposed to S. japonicum cercariae or soluble egg antigen (SEA)	90	insulin resistance, lipid profile, body weight	Prior to PZQ treatment, infection was significantly associated with lower body weight (p<0.01) and higher insulin sensitivity (p<0.01), and lower lipid profile (not significant). PZQ treatment improved insulin sensitivity (p<0.05) and infected mice gained weight (p<0.01) as compared to control mice. LDL, HDL, and TC did mostly increase at various time points after PZQ treatment in infected mice, …	as above
1123	Machado 2018	Host-Parasite Interactions in Individuals with Type 1 and 2 Diabetes Result in Higher Frequency of Ascaris lumbricoides and Giardia lamblia in Type 2 Diabetic Individuals	Mixed helminths		Machado, 2018, Journal of Diabetes Research	cross-sectional	Brazil	Human participants with T1DM and T2DM who had various intestinal parasitic infections on stool studies	156	Frequency of intestinal parasites among individuals with T1DM and T2DM	Enteroparasites or commensals frequency in diabetics was 64%. In particular, there was a higher frequency of T2DM than T1DM that was seen in individuals with Ascaris lumbricoides (p<0.01).	n/a
1113	Magen 2013	Chronic Opisthorchis felineus infection attenuates atherosclerosis - An autopsy study	Opisthorchis species		Magen, 2013, International Journal for Parasitology	post-mortem/autopsy study	Russia	Human autopsy cases	319	aortic atherosclerosis and serum total cholesterol	Infected subjects had lower serum total cholesterol (mild worm burden, 186.4 ± 25.6 mg/dl; moderate worm burden, 183.4 ± 23.1 mg/dl, p= 0.002; severe worm burden, 170.6 ± 25.1 mg/dl, p< 0.001) than non-infected subjects (201.1 ± 21.2 mg/dl). Chronic helminthic infections was a negative predictor of aortic atherosclerosis with an odds ratio of 1.72 (1.02–2.91), p= 0.041 for all subjects; and 3.19 …	n/a
1044	Onuegbu 2011	Lipid profile of subjects infected with Schistosoma Haematobium in South-Western Nigeria	Schistosoma haematobium		Onuegbu, 2011, Pakistan Journal of Medical Sciences	cross-sectional	Nigeria	School-age children (ages 7-13 years) with and without S. haematobium infection (urine microscopy)	200	lipid profile	The mean plasma concentrations of triglyceride, total cholesterol, HDL-C, and LDL-C were significantly lower (p<0.01) in schistosome-infected subjects in comparison to controls. Apart from the mean total cholesterol which was significantly reduced (p<0.05) in males than in females, there were no significant differences in the mean plasma concentration of triglyceride, HDL-C, and LDL-C between mal…	n/a
1034	Osada 2017	Dual genetic absence of STAT6 and IL-10 does not abrogate anti-hyperglycemic effects of Schistosoma mansoni in streptozotocin-treated diabetic mice	Schistosoma mansoni		Osada, 2017, Experimental Parasitology	animal study	Japan	Age-matched male WT C57BL/6 and gene-deficient (STAT6KO, IL-10KO, and STAT6/IL-10 double deficient) mice induced with streptozotocin and exposed vs. not exposed to S. mansoni cercariae	unclear	blood glucose, degradation of pancreatic islets	S. mansoni infection partially prevented the degradation of pancreatic islets and hyperglycemia in mice treated with STZ (p<0.01 and p<0.001, respectively).	n/a
927	Phiri 2007	The serum glucose and beta-hydroxybutyrate levels in sheep with experimental Fasciola hepatica and Fasciola gigantica infection	Fasciola species		Phiri, 2007, Veterinary Parasitology	animal study	unclear, possibly Scotland	Sheep infected with and without Fasciola hepatica or gigantica metacercariae	28	serum glucose, weight gain	All infected sheep lost weight between 6-8 and 11 weeks post infection (wpi), and gained less weight by the end of the experiment than the uninfected sheep. There was a significant difference (p<0.05) between F. hepatica infected sheep and the uninfected controls in glucose levels from 6 wpi to the end of the experiment, while in F. gigantica infected animals, there was a significant difference (…	n/a
887	Pugh 1979	Malumfashi-Endemic-Diseases-Research-Project-Ix - Urinary Schistosomiasis and Hypertension in the Malumfashi Area	Schistosoma species		Pugh, 1979, Annals of Tropical Medicine & Parasitology	cross-sectional	Nigeria	Men from two areas (endemic vs. non-endemic)	341	hypertension	urinary schistosomiasis is not associated with hypertension	n/a
857	Rajamanickam 2019	Metabolic Consequences of Concomitant Strongyloides stercoralis Infection in Patients With Type 2 Diabetes Mellitus	Strongyloides stercoralis		Rajamanickam, 2019, Clinical Infectious Diseases	prospective cohort	India	Human participants with and without S. stercoralis infection	118	diabetes (hemoglobin A1c and glucose), plasma insulin level	At baseline, hemoglobin A1c and random blood glucose were not different between the 2 groups, but the level of insulin was significantly lower (p=0.0254) in the infected group. After anthelmintic treatment, plasma levels of hemoglobin A1c increased by 25% (p<0.0001), random blood glucose increased by 18% (p<0.0001), and insulin increased by 13% (p=0.0101) in infected individuals compared to pretr…	as above
854	Rajamanickam 2020	Impact of Helminth Infection on Metabolic and Immune Homeostasis in Non-diabetic Obesity	Strongyloides stercoralis		Rajamanickam, 2020, Frontiers in Immunology	prospective cohort	India	Human participants with and without S. stercoralis infection (both groups with non-diabetic obesity)	115	plasma insulin level, random blood glucose, BMI	At baseline, infected obese individuals had lower insulin levels (p=0.0012) when compared to uninfected obese individuals. After treatment, this was reversed (insulin level increased by 9% in infected individuals; p=0.0009).	as above
723	Toulah 2018	Therapeutic effects of Schistosoma mansoni soluble egg antigen in high fat diet induced dyslipidemia, hepatic and cardiovascular pathology in mice	Schistosoma mansoni		Toulah, 2018, Tropical Biomedicine	animal study	Egypt	Male Swiss albino mice with and without S. mansoni infection (SEA or cercariae) that were fed either a standard or high-fat diet	40	lipid profile and cardiovascular pathology	HFD+SEA mice showed high significant (p<0.001) reduction of TC (102.37±5.26 mg/dl), LDL-C (39.7±3.65mg/dl) and TG (88.62±6.71 mg/dl) with significant (p<0.05) increase of HDL-C (44.92±1.6 mg/dl) when compared to HFD mice. However, serum levels of TC, LDL-C and TG were still significantly higher(p<0.001) and LDH-C level was significantly lower (p<0.05) than that of SD mice. Serum lipid levels of S…	n/a
532	Sanya 2020	The Effect of Helminth Infections and Their Treatment on Metabolic Outcomes: Results of a Cluster-Randomized Trial	Mixed helminths	Schistosoma mansoni, Strongyloides stercoralis, Trichuris trichiura	Sanya, 2020, Clinical Infectious Diseases	cluster RCT	Uganda	Human participants with various helminth infections (one stool sample, 2 slides prepared using Kato-Katz technique) in different fishing villages that were then cluster-randomized to standard (annual single-dose praziquantel, biannual single-dose albendazole) vs. intensive (quarterly single-dose praziquantel, triple-dose albendazole)	1898 partipants in 26 villages	homeostatic model assessment of insulin resistance (HOMA-IR), lipid panel, fasting blood glucose, blood pressure	Intensive treatment had no effect on HOMA-IR (adjusted geometric mean ratio, 0.96 [95% confidence interval {CI}, .86–1.07]; p = .42) but resulted in higher mean low-density lipoprotein cholesterol (LDL-c) (2.86 vs 2.60 mmol/L; adjusted mean difference, 0.26 [95% CI, −.03 to .56]; p = .08). Lower LDL-c levels were associated with Schistosoma mansoni (2.37 vs 2.80 mmol/L; −0.25 [95% CI, −.49 to −.0…	as above
527	Sarin 1991	Hyperdynamic Circulation in a Chronic Murine Schistosomiasis Model of Portal-Hypertension	Schistosoma mansoni		Sarin, 1991, Hepatology	animal study	U.S.A.	Mice (C3H strain) with and without S. mansoni infection (cercariae)	19	mean arterial pressure, peripheral vascular resistance	Infected mice had reduced peripheral vascular resistance (112.05 +/- 14.05 vs 254.53 +/- 29.86; p < 0.01) and lower mean arterial pressure (81.37 +/- 3.09 vs. 101.45 +/- 5.85; p < 0.05).	n/a
519	Saule 2005	Host glucose metabolism mediates T4 and IL-7 action on Schistosoma mansoni development	Schistosoma mansoni		Saule, 2005, Journal of Parasitology	animal study	France	Female C57BL/6 mice with and without S. mansoni infection (cercariae)	unclear	glucose tolerance, insulin resistance	Infected mice demonstrated reduced glucose tolerance from day 7 to day 21 compared with uninfected animals (p<0.05). This was followed by a peak of insulinemia in infected animals.	n/a
451	Shen 2015	The potential long-term effect of previous schistosome infection reduces the risk of metabolic syndrome among Chinese men	Schistosoma species		Shen, 2015, Parasite Immunology	cross-sectional	China	Men with and without prior schistosome infection (current infection was ruled out in all participants by stool Kato-Katz method).	1597	metabolic syndrome parameters: lipids, WC and BMI, hypertension, hyperglycemia	The prevalences of MS (p<0 001) and its components including central obesity (p<0 001), hypertriglyceridemia (p<0 001), low HDL-C (p<0 001), hypertension (p<0 01) and hyperglycaemia (p<0 01) were significantly lower in the PSI group than in the control group. Logistic regression analysis revealed significant negative associations between PSI and MS (odds ratio [OR]=0 434,95% confidence interval […	n/a
450	Shen 2015	Potential long-term effects of previous schistosome infection may reduce the atherogenic index of plasma in Chinese men	Schistosoma species		Shen, 2015, International Journal of Parasitology	cross-sectional	China	Men aged 45 years and above with or without a history of previous schistosome infection (all participants underwent fecal examination by the Kato-Katz method and were confirmed parasite-free at the time of sampling).	1597	Atherogenic Index of Plasma, lipid profile, body mass index	Men with PSI had a significantly lower (all p values <0.001) prevalence of Atherogenic Index of Plasma, triglycerides, and BMI and significantly higher HDL-C than controls. A logistic regression analysis demonstrated a significant negative correlation between PSI and the AIP (OR = 0.583; 95% CI, 0.440–0.772; p< 0.001) after adjustment for BMI, waist circumference, DBP and uric acid, suggesting th…	n/a
449	Shen 2014	The potential long-term effect of previous schistosome infection may reduce the risk factors for cardiovascular diseases	Schistosoma species		Shen, 2014, International Journal of Cardiology	cross-sectional	China	Human participants with and without a history of previous schistosome infection	1942	risk factors for cardiovascular disease: obesity and abdominal obesity (waist circumference and BMI), hypertension (blood pressure), hyperglycemia (fasting blood glucose), and hyperlipidemia (lipid profile)	The level of HDL-C was significantly higher in all subjects with PSI than those without (1.36 ± 0.34 vs 1.18 ± 0.24 for men, and 1.55 ±0.34 vs 1.33 ± 0.29 for female, both p<0.001), while the TG level was significantly lower in the PSI group than in the control group (1.36 ±1.02 vs 1.83 ± 1.24 for men, 1.21 ± 0.87 vs 1.67 ± 1.13 for female, both p<0.01). The incidence of hypertriglyceridemia (21.…	n/a
372	Sobh 1993	Infectious Glomerulopathy Induced by a Defined Agent (Schistosoma-Mansoni) - Progression Despite Early Elimination of the Causal Agent	Schistosoma mansoni		Sobh, 1993, Experimental Nephrology	animal study	Egypt	Syrian golden hamsters with and without S. mansoni infection (cercariae)--three groups were formed: infected treated, infected untreated, and negative control	40	total cholesterol	Control hamsters had the lowest total cholesterol among the 3 groups throughout the experiment (unclear statistical significance). At 24 weeks, infected untreated hamsters had significantly lower total cholesterol than infected treated hamsters (146.7 vs. 197.8, respectively; p<0.05).	as above
367	Soliman 1996	High prevalence of islet cell antibody and defective insulin release in children with schistosomiasis	Schistosoma species		Soliman, 1996, Journal of Tropical Pediatrics	cross-sectional	Egypt	Children without and without schistosome infection (demonstration of schistosoma eggs in stool and/or urine sample); there were also children with insulin-dependent diabetes and non-diabetic siblings of those individuals enrolled (presumably both of these groups did not have schistosome infection).	94	glucose tolerance and islet cell antibodies (ICA)	Children with schistosome infection had a 25% frequency of positive ICA when compared to those with IDDM (50%) and siblings of children with IDDM (13%)---not statistically significant. Compared to controls, those with schistosome infection had lower insulin release in response to an intravenous glucose load (p<0.05).	n/a
333	Stanley 2009	Effects of Schistosoma mansoni worms and eggs on circulating cholesterol and liver lipids in mice	Schistosoma mansoni		Stanley, 2009, Atherosclerosis	animal study	United Kingdom	ApoE-/- mice and random-bred Theiler's Original (TO) strain mice with and without S. manonsi infection (cercariae, whole eggs, and SEA) that were either fed a standard or high-fat diet.	unclear, possibly 106	total cholesterol	The results indicate that the serum cholesterol-lowering effect is mediated by factors released from S. mansoni eggs, while the presence of adult worms seemed to have had little or no effect (in the early stage of infection, though total cholesterol was found to be reduced in an infection-dose-dependent manner on day 46 after infection: 25 cercariae p<0.05; 50 cercariae p<0.01; 100 cercariae p<0.…	n/a
305	Sukkar 1974	Impaired Glucose-Tolerance in Hepatic Schistosomiasis	Schistosoma species		Sukkar, 1974, Transactions of the Royal Society of Tropical Medicine and Hygiene	cross-sectional	Sudan	Men with hepatic schistosomasis	21	glucose tolerance test, fasting blood glucose	Low fasting blood glucose levels and abnormal glucose tolerance tests were encountered in some of these patients (with schistosomiasis), but the mean results were not statistically significant. It did not appear that the oral glucose tolerance tests were statistically significant (compared to control group?), though some degree of glucose intolerance was seen in patients with schistosomiasis.	n/a
278	Tahapary 2018	Impact of rural-urban environment on metabolic profile and response to a 5-day high-fat diet	Mixed helminths	soil-transmitted helminths (no further description)	Tahapary, 2018, Scientific Reports	cross-sectional and interventional	Indonesia	Human participants living in a rural area (Flores) vs. urban area (Jakarta) with comparison of metabolic profiles between these two groups as well as response to a 5-day high-fat diet in a small subset of individuals	154	insulin resistance (HOMA-IR), body weight	The urban group had significantly higher whole-body insulin resistance (IR), as assessed by homeostatic-model-assessment of IR (HOMA-IR), [mean difference (95% CI), p-value: 0.10 (0.02–0.17), p=0.01]. The authors also recruited 17 urban and 17 rural age-and-BMI-matched healthy-young-male volunteers for a 5-day HFD challenge. The HOMA-IR increased in both groups similarly −0.77 (−2.03–0.49), p=0.2…	n/a
277	Tahapary 2017	Effect of Anthelmintic Treatment on Insulin Resistance: A Cluster-Randomized, Placebo-Controlled Trial in Indonesia	Mixed helminths	Ascaris lumbricoides, Trichuris trichiura, Strongyloides stercoralis	Tahapary, 2017, Clinical Infectious Diseases	cluster RCT	Indonesia	Human participants with soil-transmitted helminth infections who were household-cluster-randomized to either receive 4 rounds of albendazole or placebo intervention	1669	insulin resistance (homeostatic model assessment of IR); BMI, blood pressure, lipid profile, hemoglobin A1c, and high-sensitivity CRP were also reported	At the community level, neither HOMA-IR nor BMI, waist circumference, fasting blood glucose, HbA1c, total cholesterol, HDL-C, LDL-C, triglycerides, or hs-CRP were found to be affected by albendazole treatment Albendazole treatment resulted in a significant increase in HOMA-IR (0.031 [95% CI, .004 to .059]; p = .04) (Figure 3A). This effect was greater in comparison to subjects without helminth in…	as above
257	Tang 2019	Schistosoma japonicum Soluble Egg Antigen Protects Against Type 2 Diabetes in Lepr(db)(/)(db) Mice by Enhancing Regulatory T Cells and Th2 Cytokines	Schistosoma japonicum		Tang, 2019, Frontiers in Immunology	animal study	China	Male C57BL/6 mice and Lepr^db/db mice (C57BL/6 mice with thediabetesdbmutation in the leptin receptor) divided into 4 groups: C57BL/6 (the normal group), S. japonicum SEA (C57BL/6 mice treated with SEA), Lepr^db/db, and SEA and Lepr^db/db co-treatment groups.	24	insulin resistance	SEA lead to reduced insulin resistance among the different groups (p<0.05). SRA treatment also led to improved wound healing (tail wounds readily healed after SEA treatment).	n/a
232	Thabet 2008	Decreased basal non-insulin-stimulated glucose uptake by diaphragm in streptozotocin-induced diabetic mice infected with Schistosoma mansoni	Schistosoma mansoni		Thabet, 2008, Parasitology Research	animal study	Egypt	Female Swiss albino mice were divided into 4 groups: (1) control group, (2) group infected with S. mansoni (cercariae), (3) group injected with streptozotocin to induce diabetes, and (4) group infected and then 3 months post-infection injected with streptozotocin. All animals were sacrificed at 28 days.	55	serum insulin, blood glucose, and glucose uptake (by diaphragm)	Infected diabetic mice had less peripheral glucose uptake into the diaphragm as compared to control mice and diabetic, non-infected mice (both p<=0.05). Otherwise infected diabetic mice had higher blood glucose and serum insulin than control mice (both p<=0.05) and there were no differences in these parameters between infected diabetic mice and diabetic non-infected mice. However, observation of …	n/a
189	Wiedermann 1991	Intestinal Worm Burden and Serum-Cholesterol or Lipid-Concentration in a Shipibo Population (Peru)	Mixed helminths	Ascaris lumbricoides, Trichuris trichiura, Strongyloides stercoralis, hookworm	Wiedermann, 1991, Zentralblatt Fur Bakteriologie-International Journal of Medical Microbiology Virology Parasitology and Infectious Diseases	cross-sectional	Peru	Human participants from the Shipibo tribe in the rain forest of the Peruvian lowlands	40	lipid profile	Serum lipids were low among these infected individuals (most did not appear significant). There was an inverse correlation between worm egg excretion and HDL levels (for those with hookworm, Strongyloides, and Trichuris), whereby HDL was significantly higher in the those with lower burdens of infection (p<0.01).	n/a
167	Wiria 2015	Infection with Soil-Transmitted Helminths Is Associated with Increased Insulin Sensitivity	Mixed helminths	Ascaris lumbricoides, Trichuris trichiura, Strongyloides stercoralis, Ancylostoma duodenale	Wiria, 2015, PLOS ONE	cross-sectional	Indonesia	Adults living on Flores Island with various STH infections and stratified by the number of STH species infections.	646	BMI, waist-to-hip ratio (WHR), fasting blood glucose (FBG), insulin resistance (homeostatic model assessment for insulin resistance), and high-sensitive CRP	STH infected participants had lower BMI (23.2 vs 22.5 kg/m2, p value = 0.03) and lower HOMA-IR (0.97 vs 0.81, p value = 0.05). WHR, FBG, and hsCRP were not statistically different between uninfected and infected individuals. In an age-, sex- and BMI-adjusted model a significant association was seen between the number of infections and HOMAIR: for every additional infection with STH species, theHO…	n/a
165	Wiria 2013	Relationship between Carotid Intima Media Thickness and Helminth Infections on Flores Island, Indonesia	Mixed helminths	Trichuris trichiura, Ascaris lumbricoides, Necator americanus, Ancylostoma duodenale, Strongyloides stercoralis	Wiria, 2013, PLOS ONE	cross-sectional	Indonesia	Adults living on Flores Island with various STH infections	675	carotid intima thickness, BMI, blood pressure, fasting blood glucose (FBG), lipid profile, high-sensitivity CRP	Participants with any STH infection had lower BMI (mean difference -0.66, 95%CI [-1.26,- 0.06], p=0.031), WHR(-0.01, [-0.02, -0.00], p=0.011), total cholesterol (-0.22, [-0.43, -0.01], p=0.037) and LDL-cholesterol (-0.20, [-0.39, -0.00], p=0.048) than uninfected participants. After additional adjustment for BMI the association between helminth infection and total cholesterol (mean difference -0.1…	n/a
159	Wolfs 2014	Reprogramming macrophages to an anti-inflammatory phenotype by helminth antigens reduces murine atherosclerosis	Schistosoma mansoni		Wolfs, 2014, Faseb Journal	animal study	The Netherlands	C57BL/6 wild-type and LDLR^-/- mice exposed vs. unexposed to S. mansoni SEA (vs. PBS). To investigate the immune modulatory effect of SEAs in vivo, LDLR^-/-mice fed a high-cholesterol diet (HCD; 16% fat, 0.15% cholesterol; AB Diets, Woerden, The Netherlands) were weekly injected subcutaneously for 5 wk with 50g SEAs or control treatment (n 20/group).	unclear, but possibly at least 20-40	aortic root atherosclerosis, weight, total cholesterol, triglyceride	Mice treated with SEA had significantly lower (p<0.001) cholesterol after 5 and 10 weeks of a high-cholesterol diet when compared to mice treated with PBS on a high-cholesterol diet. Mice treated with SEA (as compared to PBS) saw aortic plaque progression reduced by 44% (p<0.001).	n/a
117	Yan 2020	Amelioration of type 1 diabetes by recombinant fructose-1,6-bisphosphate aldolase and cystatin derived from Schistosoma japonicum in a murine model	Schistosoma japonicum		Yan, 2020, Parasitology Research	animal study	China	Female NOD mice exposed to recombinant S. japonicum cystatin (rSjcystatin) and fructose-1,6-biphosphonate aldolase (rSjFBPA) vs. PBS (control)	30	effect of parasite recombinant proteins on T1DM	The diabetes incidence was significantly reduced in the mice that received rSjcystatin (60.0%) or rSjFBPA (60.0%) compared with the control (100%) (P<0.05). In addition, the onset time of diabetes was also delayed in the mice subjected to recombinant protein treatment. At the end of the observation period (12 weeks), the mean blood glucose value was 25.72 ± 6.31 mmol/L in the PBS group, 14.73 ± 7…	n/a
74	Yuksek 2013	Enhancement of the glucose metabolism and the reverse cholesterol transport by a peroxisome proliferator receptor alpha (PPAR alpha) agonist included in the fasciolosis treatment in naturally infested sheep	Fasciola species		Yuksek, 2013, Revue De Medecine Veterinaire	animal study	Turkey	Sheep with fasciolosis were allotted to 2 groups: one group received treatment with tricalbendazole/levamisole and the other received treatment with tricalbendazole/levamisole + a PPAR alpha agonist (2-methyl-2-phenoxy-propionic acid), and the hematological and biochemical parameters were assessed before the treatment and 7, 14 and 28 days after and were compared to control values determined from…	30	blood glucose, lipid profile	Significantly low glucose concentrations were found in Fasciola-infected sheep before treatment (p < 0.001) but since the 7th day after treatment, they significantly increased in both infected groups (day 0 vs. day 7: p < 0.05). LDL was significantly decreased at baseline (no other lipids with this association); after treatment of infection, TC, LDL, and HDL significantly increased while trig dec…	as above
65	Zaccone 2003	Schistosoma mansoni antigens modulate the activity of the innate immune response and prevent onset of type 1 diabetes	Schistosoma mansoni		Zaccone, 2003, European Journal of Immunology	animal study	United Kingdom	Female NOD mice and NOD-SCID with and without S. mansoni infection (exposure to eggs or SEA or SWA)--control mice were injected with PBS	unclear	prevention of T1DM	As few as four injections were sufficient to prevent type 1 diabetes in NOD mice. None of the injected mice developed diabetes whereas the control mice developed diabetes at 70% incidence by 27 weeks of age (p<0.005). Mice exposed to SEA or SWA were also completely protected from developing type 1 diabetes (p<0.005). Similar to the egg treatment protocol, four weekly injections with SWA and SEA e…	n/a
61	Zaman 2018	Measurement of Ascaris lumbricoides IgG antibody, associated risk factors and identification of serum biochemical parameters as biomarkers of pathogenicity: among patients with gastrointestinal complains in Pakistan	Ascaris lumbricoides		Zaman, 2018, Tropical Biomedicine	cross-sectional	Pakistan	Human participants with and without Ascaris lumbricoides IgG antibody	356	serum cholesterol, glucose levels	Of the 356 participants, 58.4% were found seropositive, 148 (41.6%) were negative. There was no significant difference in glucose levels between infected and control groups. Total cholesterol (P=0.000) were significantly elevated in Ascaris-infected patients as compared to controls.	n/a
9	Zinsou 2020	Schistosoma haematobiuminfection is associated with lower serum cholesterol levels and improved lipid profile in overweight/obese individuals	Schistosoma haematobium		Zinsou, 2020, PLOS Neglected Tropical Diseases	cross-sectional	Gabon	Adults with and without S. haematobium infection, specifically examining lean vs. obese individuals	71	lipid profile, blood glucose, insulin (HOMA-IR), BMI, hs-CRP	Urine S. haematobium egg-positive individuals exhibited lower serum total cholesterol (TC; 4.42 vs 4.01 mmol/L, adjusted mean difference [95%CI] -0.30[-0.68, -0.06]; p=0.109), HDL-C (1.44 vs 1.12 mmol/L, -0.24 [-0.43,-0.06]; p=0.009) and triglyceride (TG; 0.93 vs 0.72 mmol/L, -0.20 [-0.39,-0.03]; p=0.022) levels than egg-negative individuals. However, when stratified according to body mass index,…	n/a
